# Supplementary material for: Mechanically robust bifunctional hydrophobic polycarbazole-decorated multiwall carbon nanotube- Pithecellobium dulce oil polyester amide nanocomposite coatings: fabrication, characterization, anticorrosive and antimicrobial studies
Source: Royal Society of Chemistry journal article supplement (doi:10.1039/d4ta06332e), 2024-12-05
Supplement: d4ta06332e1.pdf [file d4ta06332e1.pdf]

## Supplementary information

Mechanically Robust Bi-functional Hydrophobic Polycarbazole Decorated  
Multiwall Carbon Nanotubes-Pithecellobium Dulce Oil Polyester-amide  
Nanocomposite Coatings: Fabrication, Characterization, Anticorrosive and  
Antimicrobial Studies

**Abu Darda<sup>1\*</sup>, Weqar Ahmad Siddiqi<sup>2</sup>**

*<sup>1</sup>Department of Sciences and Humanities, Maulana Azad College of Engineering and  
Technology, Patna, India*

*<sup>2</sup>Department of Applied Sciences and Humanities, Jamia Millia Islamia, New Delhi-110025,  
India*

**Number of pages: 7 (S-1 to S-8)**

**Number of Figures: 3 (S-1 and S-3)**

**Number of tables: 5 (S-1 to S-5)**

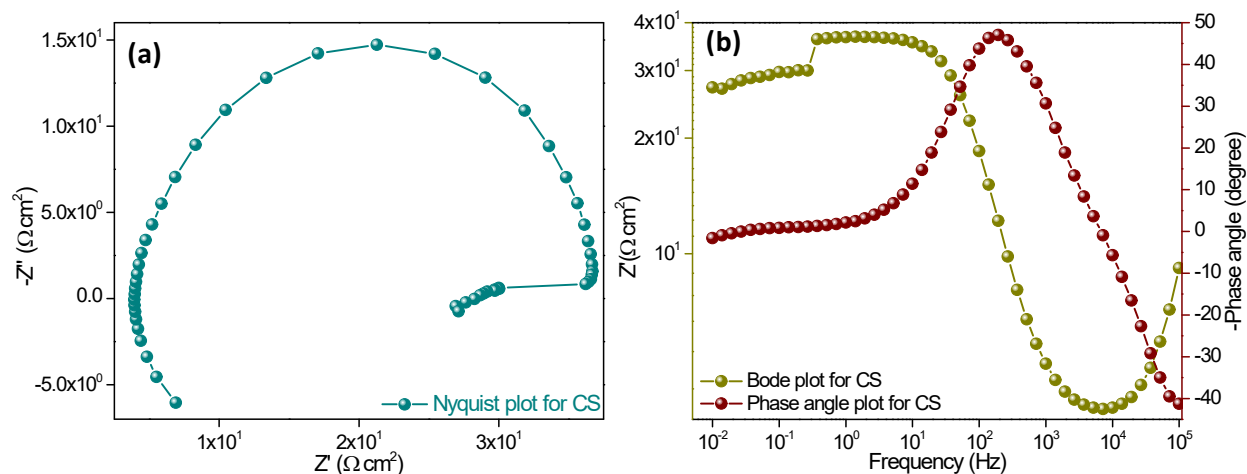

**Figure S-1** Nyquist plots for (a) CS as well as Bode and Phase angles plots for (b) CS are illustrated.

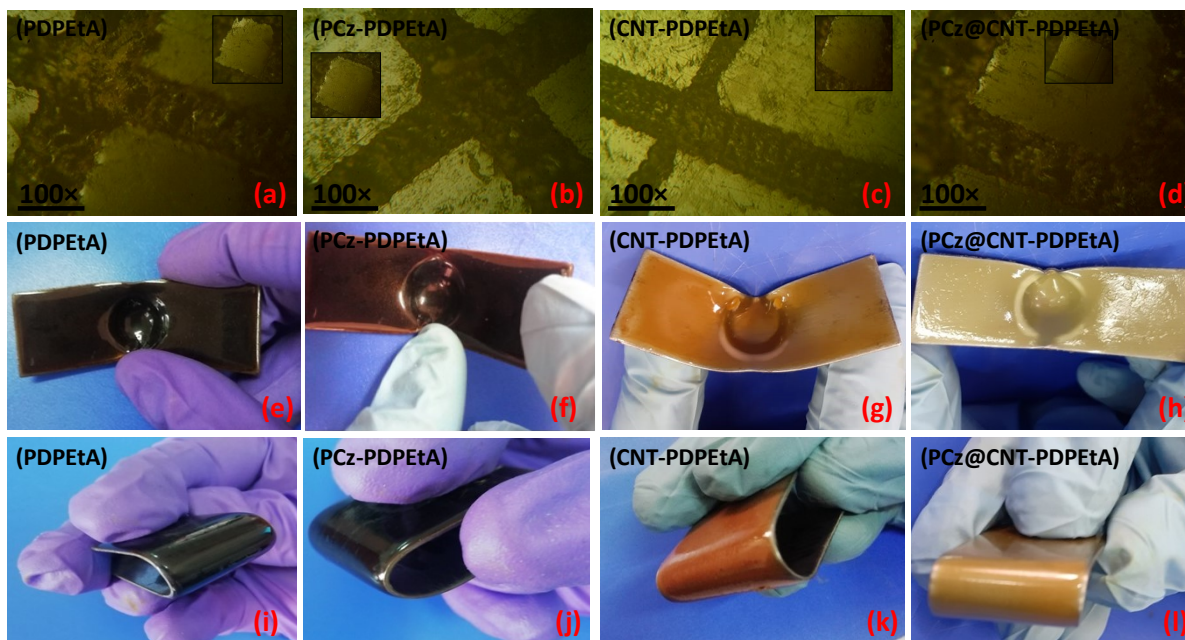

**Figure S-2** Optical micrographs of crosshatch test, digital images after impact resistance, and bend test of (a, e, i) PDPEtA, (b, f, j) PCz-PDPEtA, (c, g, k) CNT-PDPEtA and (d, h, l) PCz@CNT-PDPEtA respectively.

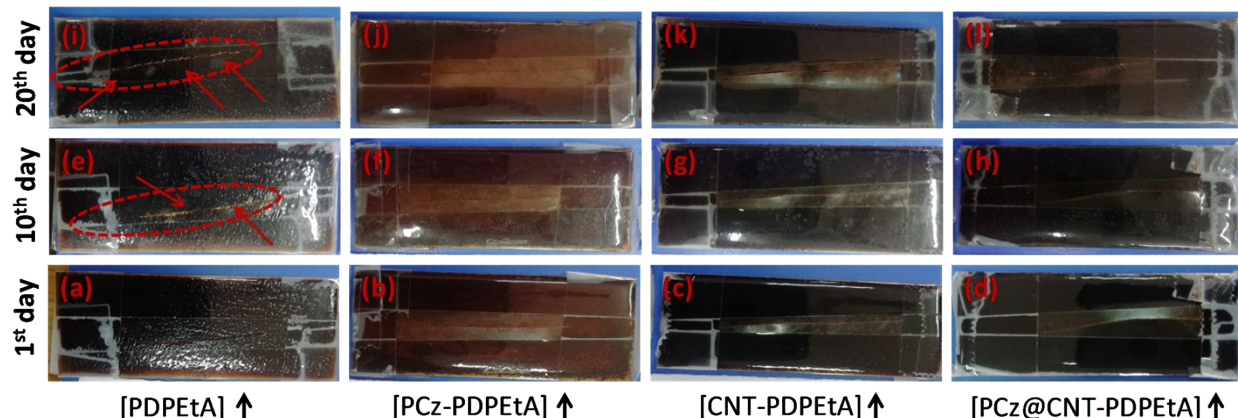

**Figure S-3** Digital images after salt-mist test of (a, e, i) PDPEtA, (b, f, j) PCz-PDPEtA, (c, g, k) CNT-PDPEtA and (d, h, l) PCz@CNT-PDPEtA for 1<sup>st</sup>, 10<sup>th</sup>, and 20<sup>th</sup> day, respectively

**Table S-1** Physico-chemical/mechanical properties

| <b>Resin Code/ Properties</b>          | <b>PDSO</b> | <b>PDFA</b> | <b>PDPEtA</b> | <b>PCz-<br/>PDPEtA</b> | <b>CNT-<br/>PDPEtA</b> | <b>PCz@CN<br/>T –<br/>PDPEtA</b> |
|----------------------------------------|-------------|-------------|---------------|------------------------|------------------------|----------------------------------|
| <b>Specific Gravity</b>                | 0.912       | 0.947       | 1.029         | 1.127                  | 1.125                  | 1.142                            |
| <b>Refractive index</b>                | 1.417       | 1.425       | 1.439         | 1.571                  | 1.539                  | 1.612                            |
| <b>Acid value (mg KOH/g)</b>           | 0.59        | 1.8         | 4.0           | 3.8                    | 3.8                    | 3.8                              |
| <b>Gloss (45° C)</b>                   | .....       | .....       | 61            | 58                     | 55                     | 49                               |
| <b>Scratch hardness (kg)</b>           | .....       | .....       | 5.50          | 9.0                    | 9.50                   | 12.00                            |
| <b>Impact resistance (150 lb/inch)</b> | .....       | .....       | Pass          | Pass                   | Pass                   | Pass                             |
| <b>Cross hatch test</b>                | .....       | .....       | Pass          | Pass                   | Pass                   | Pass                             |
| <b>Bend Test (1/8'' inch)</b>          | .....       | .....       | Pass          | Pass                   | Pass                   | Pass                             |
| <b>Dry to touch (min.)</b>             | .....       | .....       | 45            | 41                     | 40                     | 36                               |
| <b>Dry to hard (h)</b>                 | .....       | .....       | 26            | 24                     | 24                     | 22                               |

|                                     |       |       |    |    |    |    |
|-------------------------------------|-------|-------|----|----|----|----|
| Coating Thickness ( $\mu\text{m}$ ) | ..... | ..... | 88 | 90 | 91 | 93 |
|-------------------------------------|-------|-------|----|----|----|----|

**Table S-2** PDP and EIS parameters obtained from Tafel curves for coated and uncoated CS samples before and after immersion under 5wt% NaCl solutions

| Sample                            | $E_{\text{corr}}$<br>(Volt) | $I_{\text{corr}}$<br>( $\text{A}\cdot\text{cm}^{-2}$ ) | Corrosion<br>Rate(mpy) | $R_p$ ( $\Omega$ ) | $f_b$ z(H)            | $\eta_i$ (%) |
|-----------------------------------|-----------------------------|--------------------------------------------------------|------------------------|--------------------|-----------------------|--------------|
| CS                                | -0.8613                     | $3.3394 \times 10^{-5}$                                | ----                   | ----               | .....                 | ----         |
| <b>Initial immersion</b>          |                             |                                                        |                        |                    |                       |              |
| PDPEtA                            | -0.4362                     | $3.06 \times 10^{-7}$                                  | $3.56 \times 10^{-3}$  | $3.00 \times 10^6$ | $1.22 \times 10^{-3}$ | 99.08        |
| PCz-PDPEtA                        | -0.4355                     | $8.15 \times 10^{-8}$                                  | $9.47 \times 10^{-4}$  | $5.95 \times 10^6$ | $9.85 \times 10^{-2}$ | 99.75        |
| CNT-PDPEtA                        | -0.4710                     | $6.05 \times 10^{-8}$                                  | $7.04 \times 10^{-4}$  | $8.24 \times 10^6$ | $4.20 \times 10^{-2}$ | 99.81        |
| PCz@CNT-<br>PDPEtA                | -0.3976                     | $4.44 \times 10^{-8}$                                  | $5.16 \times 10^{-4}$  | $1.54 \times 10^7$ | $1.15 \times 10^{-2}$ | 99.86        |
| <b>After 20 days of immersion</b> |                             |                                                        |                        |                    |                       |              |
| PDPEtA                            | -0.4681                     | $2.92 \times 10^{-7}$                                  | $3.39 \times 10^{-3}$  | $2.57 \times 10^6$ | $1.16 \times 10^{-3}$ | 99.12        |
| PCz-PDPEtA                        | -0.3128                     | $1.62 \times 10^{-8}$                                  | $1.88 \times 10^{-4}$  | $2.51 \times 10^7$ | $5.99 \times 10^{-2}$ | 99.95        |
| CNT-PDPEtA                        | -0.5048                     | $2.33 \times 10^{-8}$                                  | $2.71 \times 10^{-4}$  | $1.33 \times 10^7$ | $1.39 \times 10^{-2}$ | 99.93        |
| PCz@CNT-<br>PDPEtA                | -0.0443                     | $9.46 \times 10^{-9}$                                  | $1.09 \times 10^{-4}$  | $1.50 \times 10^7$ | $7.90 \times 10^{-1}$ | 99.97        |

**Table S-3** Comparison between anticorrosive properties of present work with such reported previous systems under saline (NaCl aqueous solution) environment

| Sr | Coating system                          | Immersion medium                         | Ecorr (Volt)                 | Icorr (A.cm <sup>-2</sup> )                                             | Corrosion rate (mpy)  | Rp (Ω)                                                               | ηi (%) | Ref.         |
|----|-----------------------------------------|------------------------------------------|------------------------------|-------------------------------------------------------------------------|-----------------------|----------------------------------------------------------------------|--------|--------------|
| 1. | PCz@CNT-PDPEtA                          | 5 wt% NaCl                               | -0.0443                      | 9.46×10 <sup>-9</sup>                                                   | 1.09×10 <sup>-4</sup> | 1.50×10 <sup>7</sup>                                                 | 99.97  | P.W.         |
| 2. | HBPEA-PMF-80-TiO <sub>2</sub>           | 3.5 wt% NaCl                             | -0.229                       | 7.44×10 <sup>-7</sup>                                                   | 1.1×10 <sup>-3</sup>  | 2.86×10 <sup>6</sup>                                                 | .....  | <sup>1</sup> |
| 3. | HBSA-PUC                                | 3.5 wt% NaCl                             | -0.499                       | 6.66×10 <sup>-7</sup>                                                   | 5.6×10 <sup>-1</sup>  | 8.24×10 <sup>3</sup>                                                 | .....  | <sup>2</sup> |
| 4. | CPUEA-30                                | 5 wt% NaCl                               | -0.395                       | 1.37×10 <sup>-7</sup>                                                   | 1.58×10 <sup>-3</sup> | .....                                                                | .....  | <sup>3</sup> |
| 5. | 5wt% RGO/PANI                           | 3.5 wt% NaCl                             | -0.714                       | 1.21×10 <sup>-5</sup>                                                   | 1.4×10 <sup>-4</sup>  | 1.12×10 <sup>5</sup>                                                 | 81.8   | <sup>4</sup> |
| 6. | HBA-Fe <sub>3</sub> O <sub>4</sub> -1.5 | 3.5 wt% NaCl                             | -0.752                       | 3.50×10 <sup>-8</sup>                                                   | 1.1×10 <sup>-3</sup>  | 4.40×10 <sup>5</sup>                                                 | .....  | <sup>5</sup> |
| 7. | 0.5-TA-DBSA-POA-ES                      | 3.5 wt% NaCl<br>5 wt% NaCl<br>7 wt% NaCl | -0.2050<br>-0.5002<br>-0.340 | 2.48×10 <sup>-6</sup><br>5.22×10 <sup>-8</sup><br>3.42×10 <sup>-7</sup> | .....                 | 2.22×10 <sup>3</sup><br>8.87×10 <sup>3</sup><br>2.97×10 <sup>4</sup> | .....  | <sup>6</sup> |
| 8. | WPEA-PMF-80-RGO-1.5                     | pH <sup>7</sup>                          | -0.121                       | 6.62×10 <sup>-8</sup>                                                   | 3.0×10 <sup>-5</sup>  | 1.67×10 <sup>7</sup>                                                 | .....  | <sup>7</sup> |

|    |                  |         |        |                       |                       |                       |      |    |
|----|------------------|---------|--------|-----------------------|-----------------------|-----------------------|------|----|
| 9. | <b>JPEA-3</b>    | 3.5 wt% | -0.160 | $3.47 \times 10^{-6}$ | $4.03 \times 10^{-6}$ | $3.89 \times 10^{-6}$ | .... | 8  |
|    |                  | NaCl    |        |                       |                       |                       |      |    |
| 10 | <b>UCPEA-13</b>  | 5 wt%   | -0.107 | $8.27 \times 10^{-7}$ | $9.58 \times 10^{-6}$ | ....                  | .... | 9  |
|    |                  | NaCl    |        |                       |                       |                       |      |    |
| 11 | <b>LMPEA/Ag</b>  | 3.5 wt% | -0.650 | $2.28 \times 10^{-8}$ | $6.89 \times 10^{-5}$ | $3.37 \times 10^{-6}$ | 99.9 | 10 |
|    |                  | NaCl    |        |                       |                       |                       | 4    |    |
| 12 | <b>PUMEA-0.8</b> | 3.5 wt% | -0.593 | $1.66 \times 10^{-3}$ | $1.35 \times 10^{-5}$ | $2.23 \times 10^{-4}$ | .... | 11 |
|    |                  | NaCl    |        |                       |                       |                       |      |    |

**Table S-4** Screening of antibacterial activity for (d) bare PDPEtA, (e) PCz-PDPEtA, (f) CNT-PDPEtA, and (g) PCz@CNT-PDPEtA nanocomposites

| Sample         | Bacterial pathogens (Zone of inhibition in mm) |                      |                |                  |
|----------------|------------------------------------------------|----------------------|----------------|------------------|
|                | <i>B. subtilis</i>                             | <i>P. aeruginosa</i> | <i>E. coli</i> | <i>S. aureus</i> |
| PDPEtA         | 11± 0.8                                        | 10.33± 1.2           | 11± 0.8        | -                |
| CNT-PDPEtA     | 10.33± 0.9                                     | -                    | -              | 9.67± 0.5        |
| PCz-PDPEtA     | 10± 0.8                                        | -                    | -              | -                |
| PCz@CNT-PDPEtA | 15± 0.8                                        | 14.67± 0.9           | 15.33± 0.5     | 14.67± 0.9       |

**Table S-5** Comparative study on antibacterial activity of various reported antibacterial agents with present study

| Sr. No. | Antimicrobial Agent | Bacterial pathogens  | ZOI (mm)   | Ref.           |
|---------|---------------------|----------------------|------------|----------------|
|         |                     | <i>B. subtilis</i>   | 15.00± 0.8 |                |
|         |                     | <i>P. aeruginosa</i> | 14.67± 0.9 | <b>Present</b> |

|          |                       |                      |            |              |
|----------|-----------------------|----------------------|------------|--------------|
| <b>1</b> | <b>PCz@CNT-PDPEtA</b> | <i>S. aureus</i>     | 15.33± 0.5 | <b>Study</b> |
|          |                       | <i>E. coli</i>       | 14.67± 0.9 |              |
| <b>2</b> | <b>LOPU</b>           | <i>S. aureus</i>     | 5          |              |
|          |                       | <i>E. coli</i>       | 12         |              |
| <b>3</b> | <b>LOPU</b>           | <i>S. aureus</i>     | .....      | 12           |
|          |                       | <i>E. coli</i>       | 13         |              |
| <b>4</b> | <b>ASO@MPDA/ZnO</b>   | <i>S. aureus</i>     | 12-19      | 13           |
|          |                       | <i>E. coli</i>       | 12-19      |              |
| <b>5</b> | <b>NCPEA-2</b>        | <i>P. aeruginosa</i> | 11         | 14           |
|          |                       | <i>S. aureus</i>     | 13         |              |
|          |                       | <i>E. coli</i>       | 13         |              |
|          |                       | <i>S. mutans</i>     | 14         |              |

## References:

- 1 S. I. Bhat and S. Ahmad, *Prog. Org. Coatings*, 2018, **123**, 326–336.
- 2 R. S. Mishra and A. S. Khanna, *Prog. Org. Coatings*, 2011, **72**, 769–777.
- 3 M. Alam, N. M. Alandis and N. Ahmad, *Int. J. Polym. Anal. Charact.*, 2017, **22**, 281–293.
- 4 K. Cai, S. Zuo, S. Luo, C. Yao, W. Liu, J. Ma, H. Mao and Z. Li, *RSC Adv.*, 2016, **6**, 95965–95972.
- 5 O. U. Rahman, S. I. Bhat, H. Yu and S. Ahmad, *ACS Sustain. Chem. Eng.*, 2017, **5**, 9725–9734.
- 6 N. K. Rawat, S. Pathan, A. K. Sinha and S. Ahmad, *New J. Chem.*, 2016, **40**, 803–817.
- 7 M. Irfan, S. I. Bhat and S. Ahmad, *Waterborne reduced graphene oxide dispersed bio-polyesteramide nanocomposites: An approach towards eco-friendly anticorrosive coatings*, Royal Society of Chemistry, 2019, vol. 43.
- 8 M. Alam, E. Sharmin, N. M. Alandis and N. Ahmad, *E-Polymers*, 2017, **17**, 491–500.
- 9 M. R. Shaik, M. Alam and N. M. Alandis, *J. Nanomater.*, , DOI:10.1155/2015/745217.
- 10 M. Alam, N. M Alandis, E. Sharmin, N. Ahmad, F. M. Husain and A. Khan, *ACS Omega*, 2020, **5**, 30383–30394.
- 11 M. Alam, N. M. Alandis, J. Alam, N. Ahmad and M. A. Alam, *Int. J. Polym. Anal. Charact.*, 2021, **26**, 111–129.
- 12 E. Sharmin, S. M. Ashraf and S. Ahmad, *Int. J. Biol. Macromol.*, 2007, **40**, 407–422.



- 13 X. Ni, C. Li, Y. Lei, Y. Shao, Y. Zhu and B. You, *ACS Appl. Mater. Interfaces*, 2021, **13**, 57864–57879.
- 14 M. Alam, N. M. Alandis, N. Ahmad and F. M. Husain, *Ind. Crops Prod.*, 2020, **158**, 112955.
